# Supplementary material for: The role of matrix in the evaluation of analytical parameters for trace determinations using TXRF spectrometry
Source: Royal Society of Chemistry journal article supplement (doi:10.1039/d0ja00426j), 2020-11-23
Supplement: d0ja00426j1.pdf [file d0ja00426j1.pdf]

Electronic Supplimentary Information

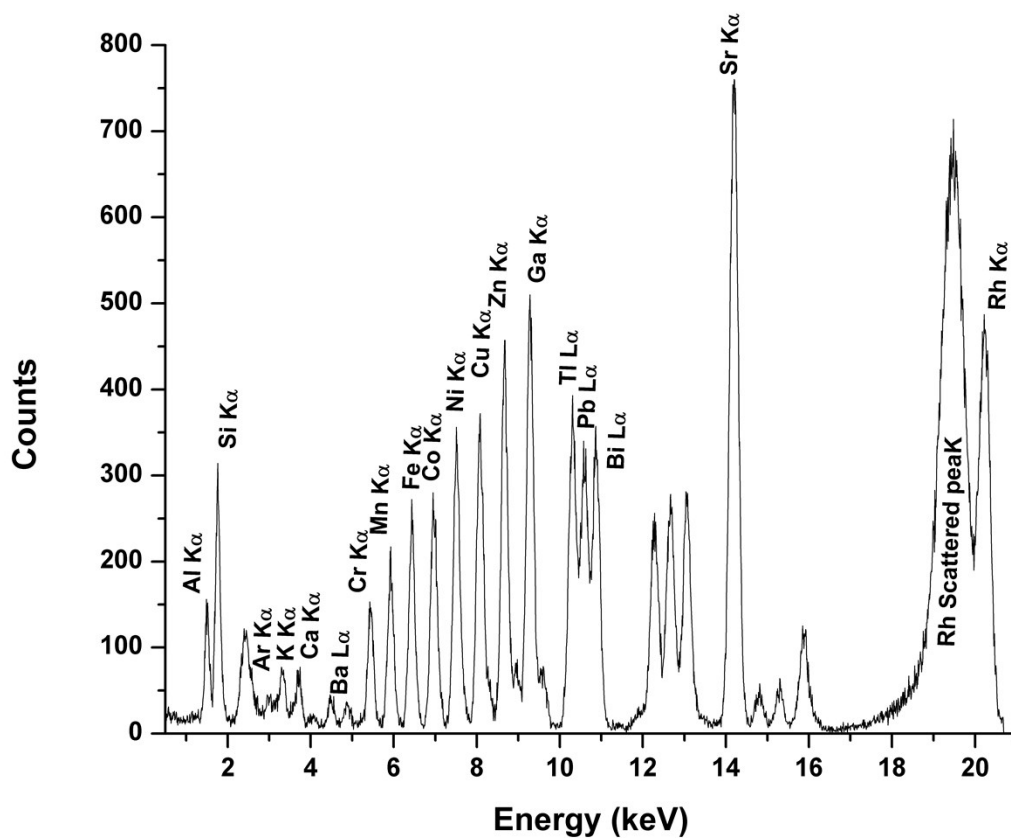

TXRF spectrum of MES having analyte concentration of 2  $\mu\text{g}/\text{mL}$  in Al matrix having concentration of 1000  $\mu\text{g}/\text{mL}$

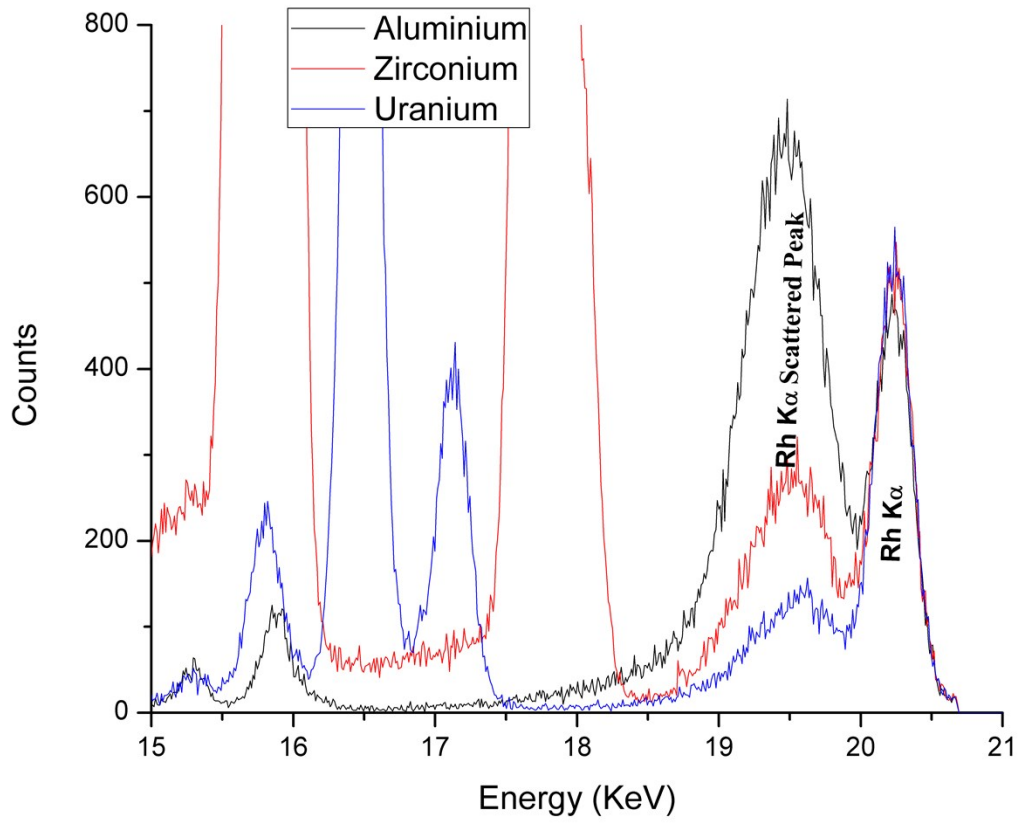

Figure showing the drastic decrease in the Compton intensity with increasing atomic number of the matrix and the matrix effect is especially visible with that peak.
